# Supplementary material for: Differential expression and clinical significance of epithelial-mesenchymal transition markers among different histological types of triple-negative breast cancer
Source: PubMed Central journal article supplement — J Cancer. 2018 Jan 5;9(3):604–13. doi: 10.7150/jca.19190 (PMC5820928; doi:10.7150/jca.19190), 2018-01-05
Supplement: jcav09p0604s1.pdf [file jcav09p0604s1.pdf]

**Table 1** Association between immunolabeling results and clinicopathological characteristics

| Parameters        | p value    |          |      |       |
|-------------------|------------|----------|------|-------|
|                   | E-cadherin | Vimentin | Slug | Twist |
| Age               | 0.6        | 0.2      | 0.03 | 0.4   |
| Menopausal Status | 0.6        | 0.4      | 0.1  | 0.6   |
| Grade             | <0.001     | 0.007    | 0.01 | 0.1   |
| Size              | 0.06       | 0.2      | 0.01 | 0.6   |
| Lymph node status | 0.8        | 0.8      | 0.09 | 0.5   |
| TNM Stage         | 0.6        | 0.6      | 0.8  | 0.7   |

**Table 2** Relationships of E-cadherin and Vimentin expression to Slug and Twist expression

| Biomarkers | E-cadherin |            | p      | Vimentin   |            | p      |
|------------|------------|------------|--------|------------|------------|--------|
|            | +          | -          |        | +          | -          |        |
| Slug       | +          | 22 (13.2%) | 0.001  | 30 (18.0%) | 17 (10.2%) | <0.001 |
|            | -          | 93 (55.7%) |        | 27 (16.2%) | 36 (21.6%) |        |
| Twist      | +          | 45 (26.9%) | <0.001 | 43 (25.7%) | 37 (22.2%) | 0.007  |
|            | -          | 70 (41.9%) |        | 17 (10.2%) | 23 (13.8%) |        |
